# Supplementary material for: Evaluation of a therapy for Idiopathic Chronic Enterocolitis in rhesus macaques (Macaca mulatta) and linked microbial community correlates
Source: PeerJ journal article supplement (doi:10.7717/peerj.4612), 2018-04-11

**A** 16S reads per sample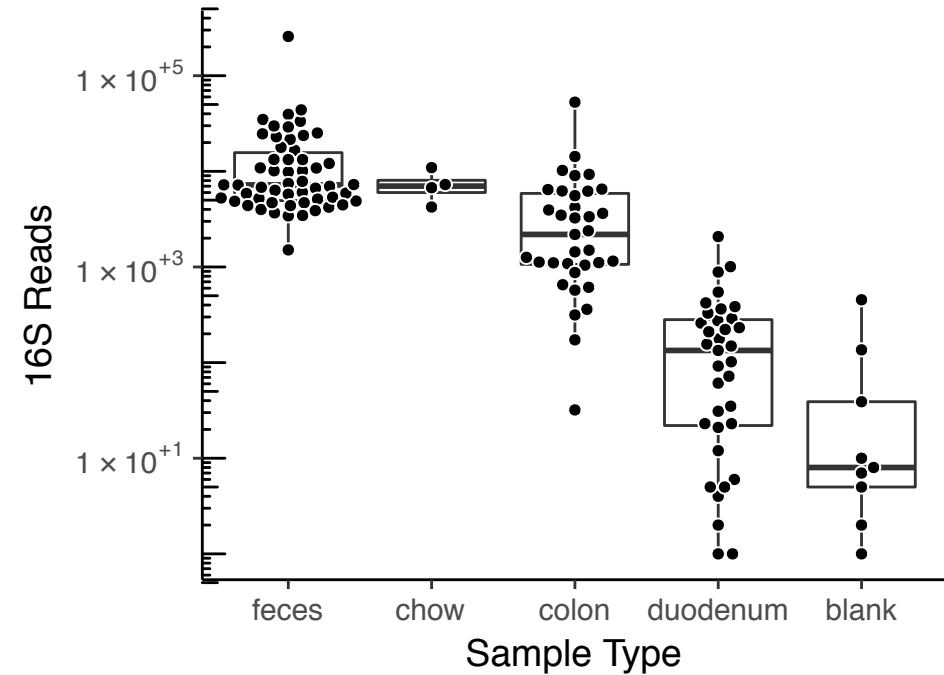**B** ITS reads per sample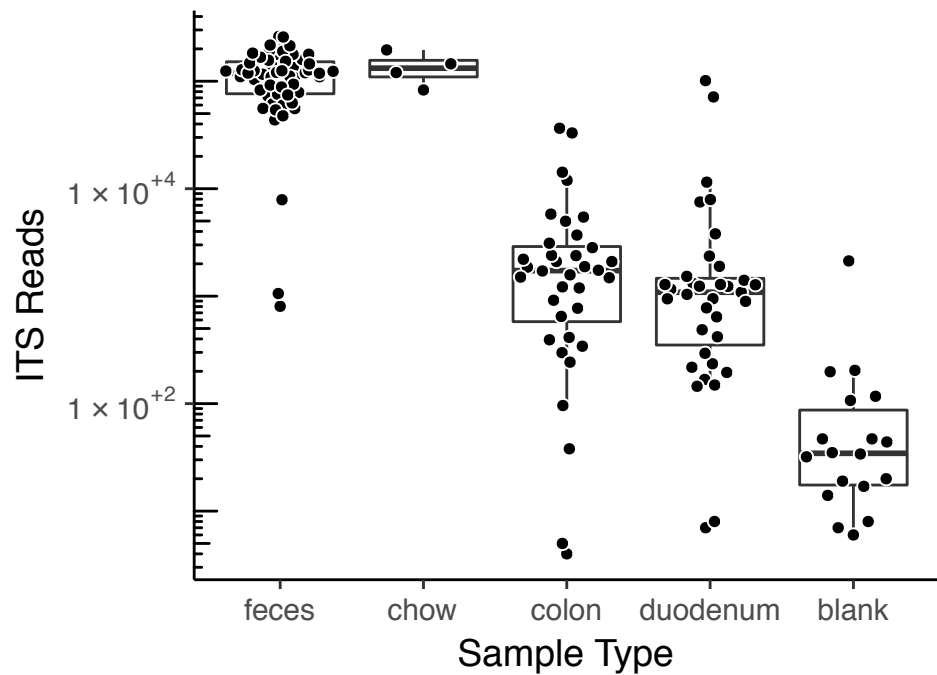

Supplement: ice_figS1.pdf [file ice_figS1.pdf]
