# Supplementary material for: Evaluation of a therapy for Idiopathic Chronic Enterocolitis in rhesus macaques (Macaca mulatta) and linked microbial community correlates
Source: PeerJ journal article supplement (doi:10.7717/peerj.4612), 2018-04-11

A

## Bacterial taxa in feces; proportions

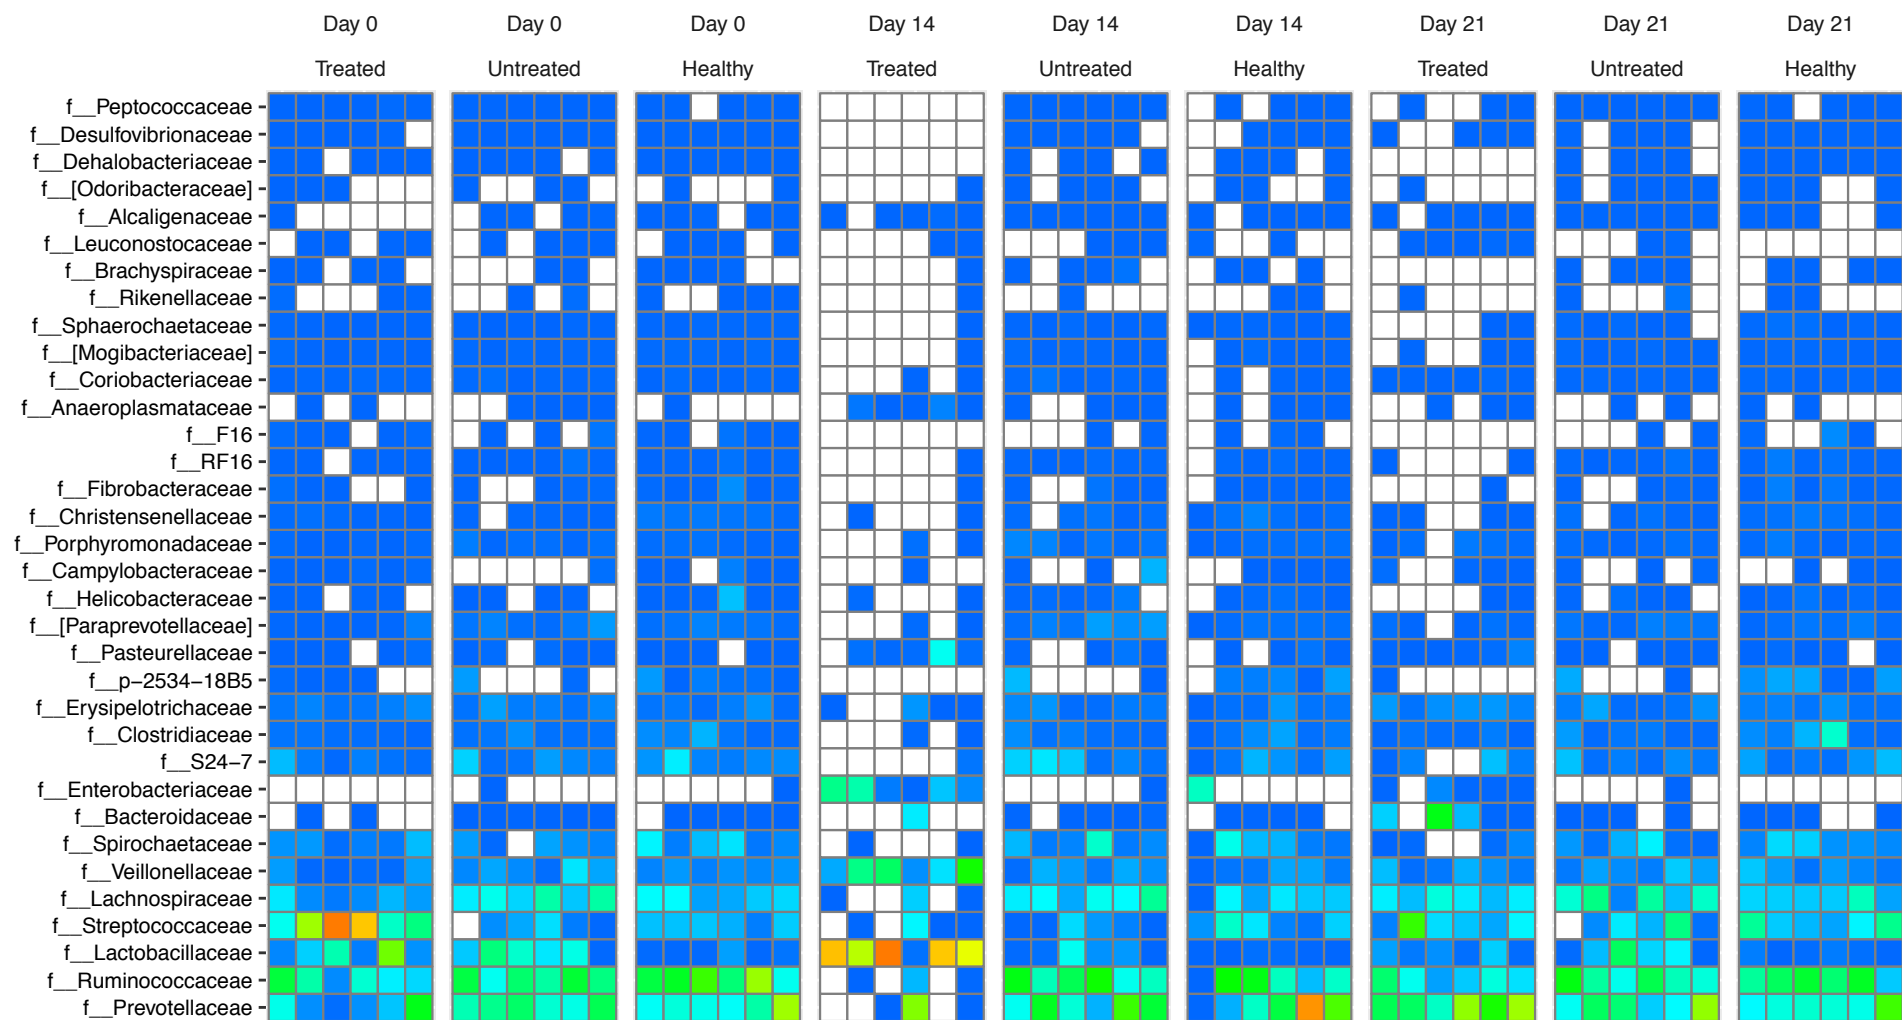

B

## Bacterial taxa in tissue; raw reads, blanks

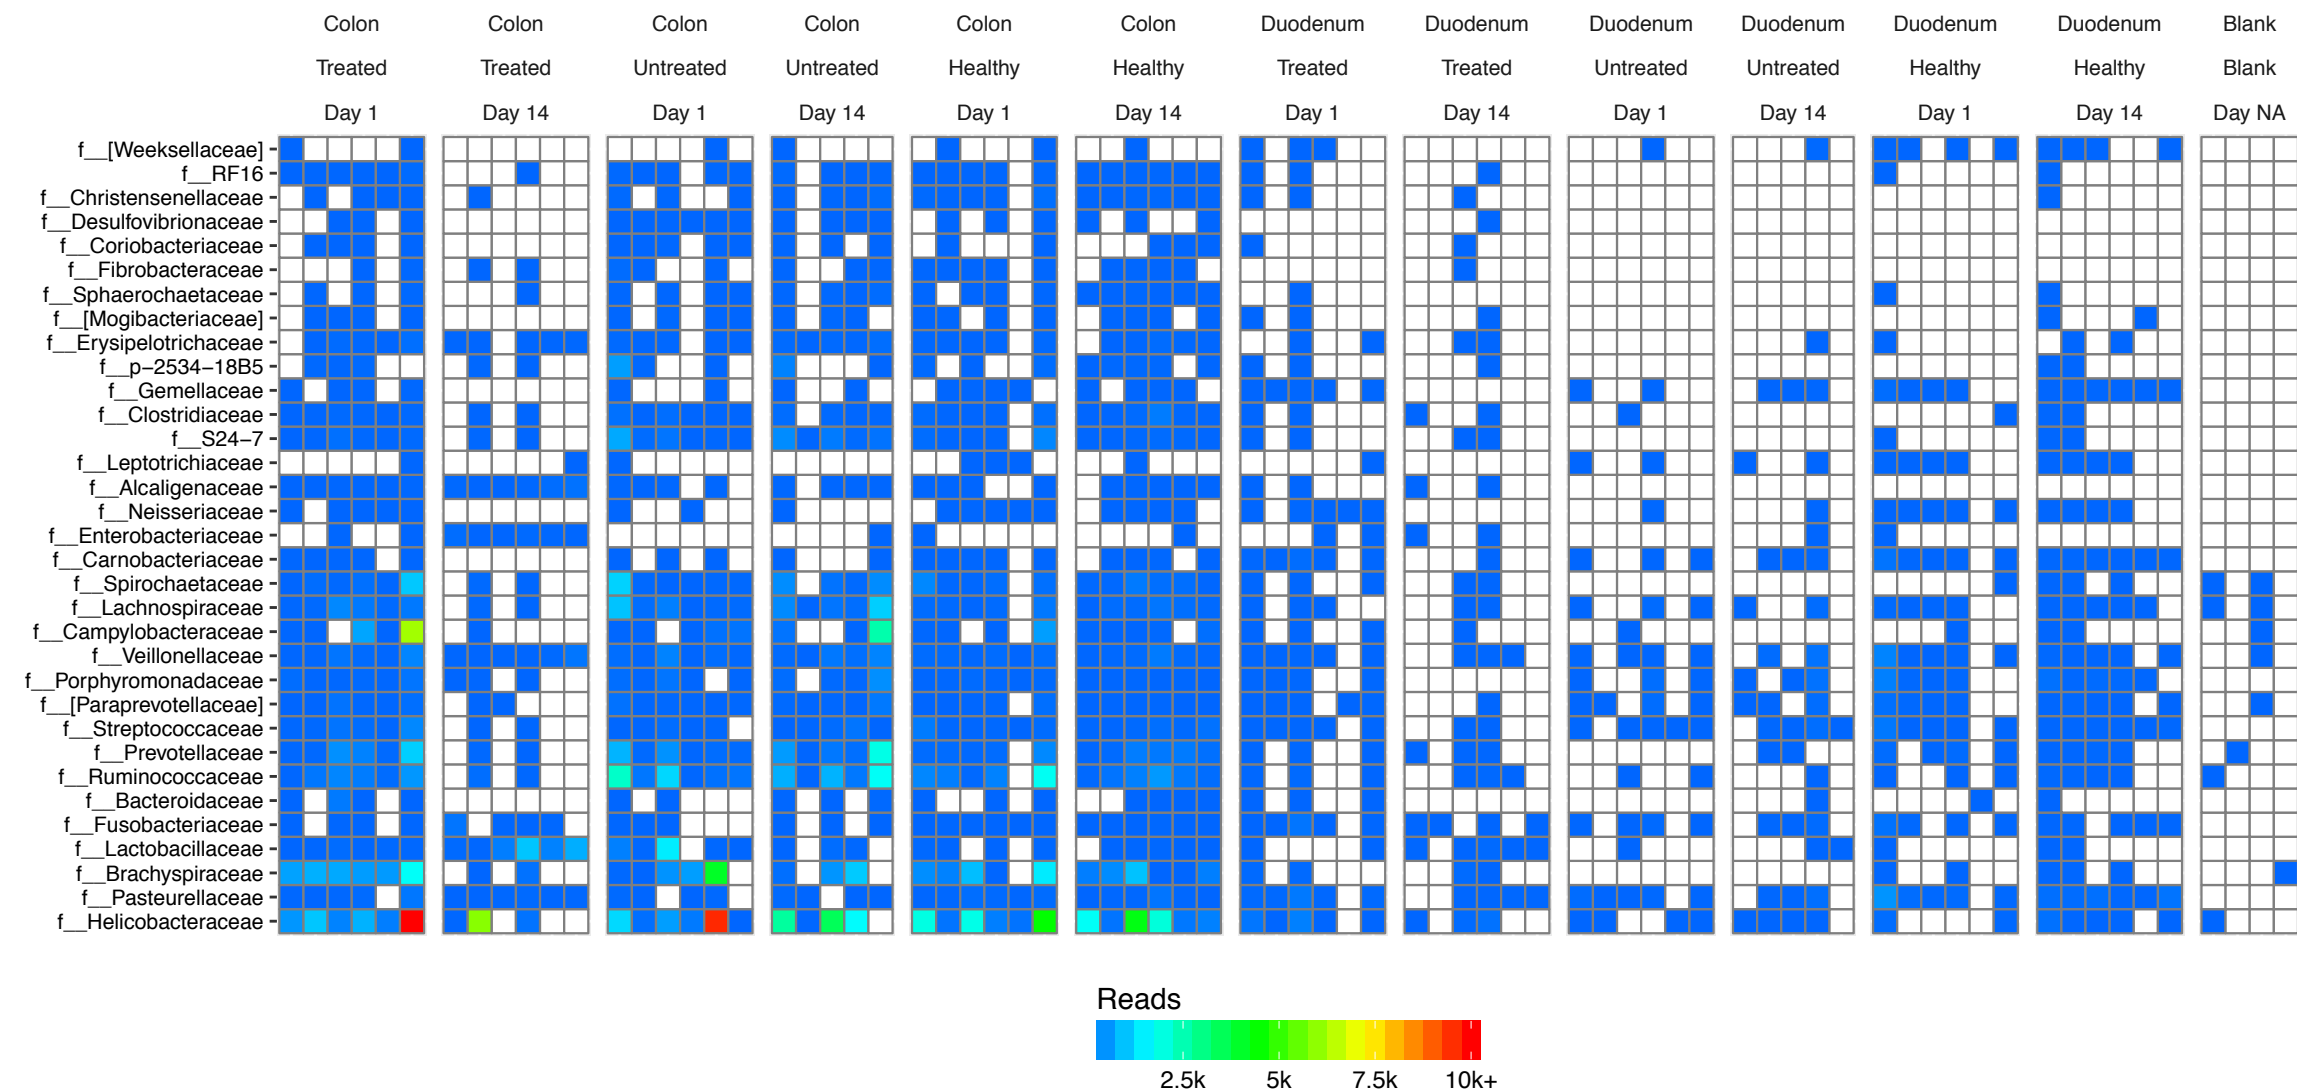

Supplement: ice_figS2.pdf [file ice_figS2.pdf]
