# Supplementary material for: Evaluation of a therapy for Idiopathic Chronic Enterocolitis in rhesus macaques (Macaca mulatta) and linked microbial community correlates
Source: PeerJ journal article supplement (doi:10.7717/peerj.4612), 2018-04-11

# Generalized UniFrac PCoA, 16S, feces only

Alpha = 0.5

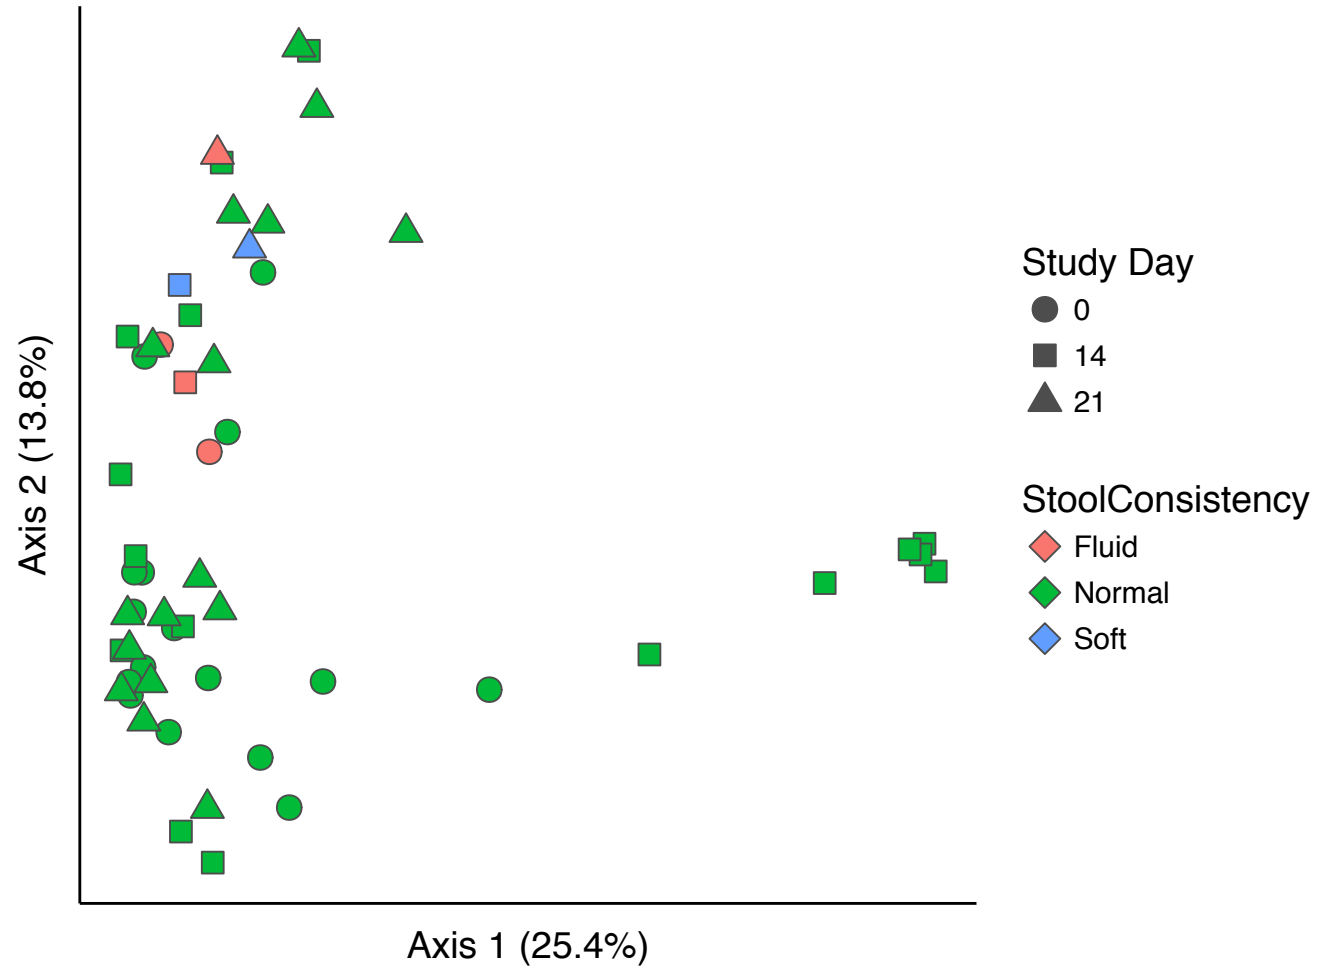

Supplement: ice_figS3.pdf [file ice_figS3.pdf]
