# Supplementary material for: Evaluation of a therapy for Idiopathic Chronic Enterocolitis in rhesus macaques (Macaca mulatta) and linked microbial community correlates
Source: PeerJ journal article supplement (doi:10.7717/peerj.4612), 2018-04-11

f\_\_Christensenellaceae (denovo326)

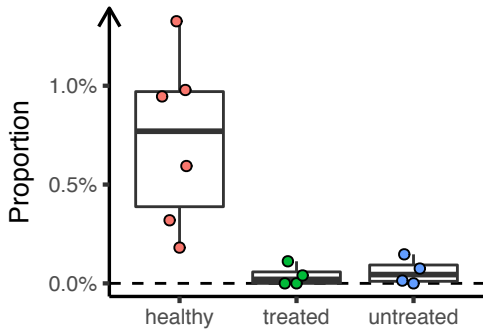

f\_\_Christensenellaceae (denovo557)

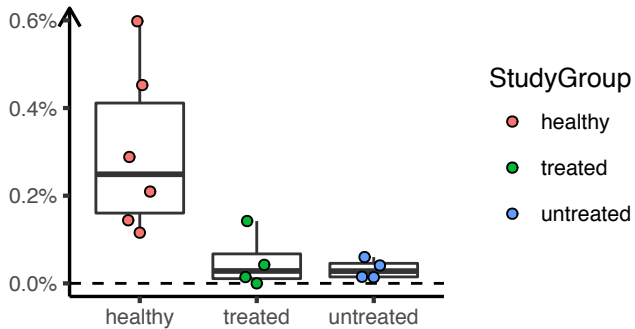

Supplement: ice_figS4.pdf [file ice_figS4.pdf]
