# Supplementary material for: Evaluation of a therapy for Idiopathic Chronic Enterocolitis in rhesus macaques (Macaca mulatta) and linked microbial community correlates
Source: PeerJ journal article supplement (doi:10.7717/peerj.4612), 2018-04-11

**A**

## Fungal taxa in feces; proportions

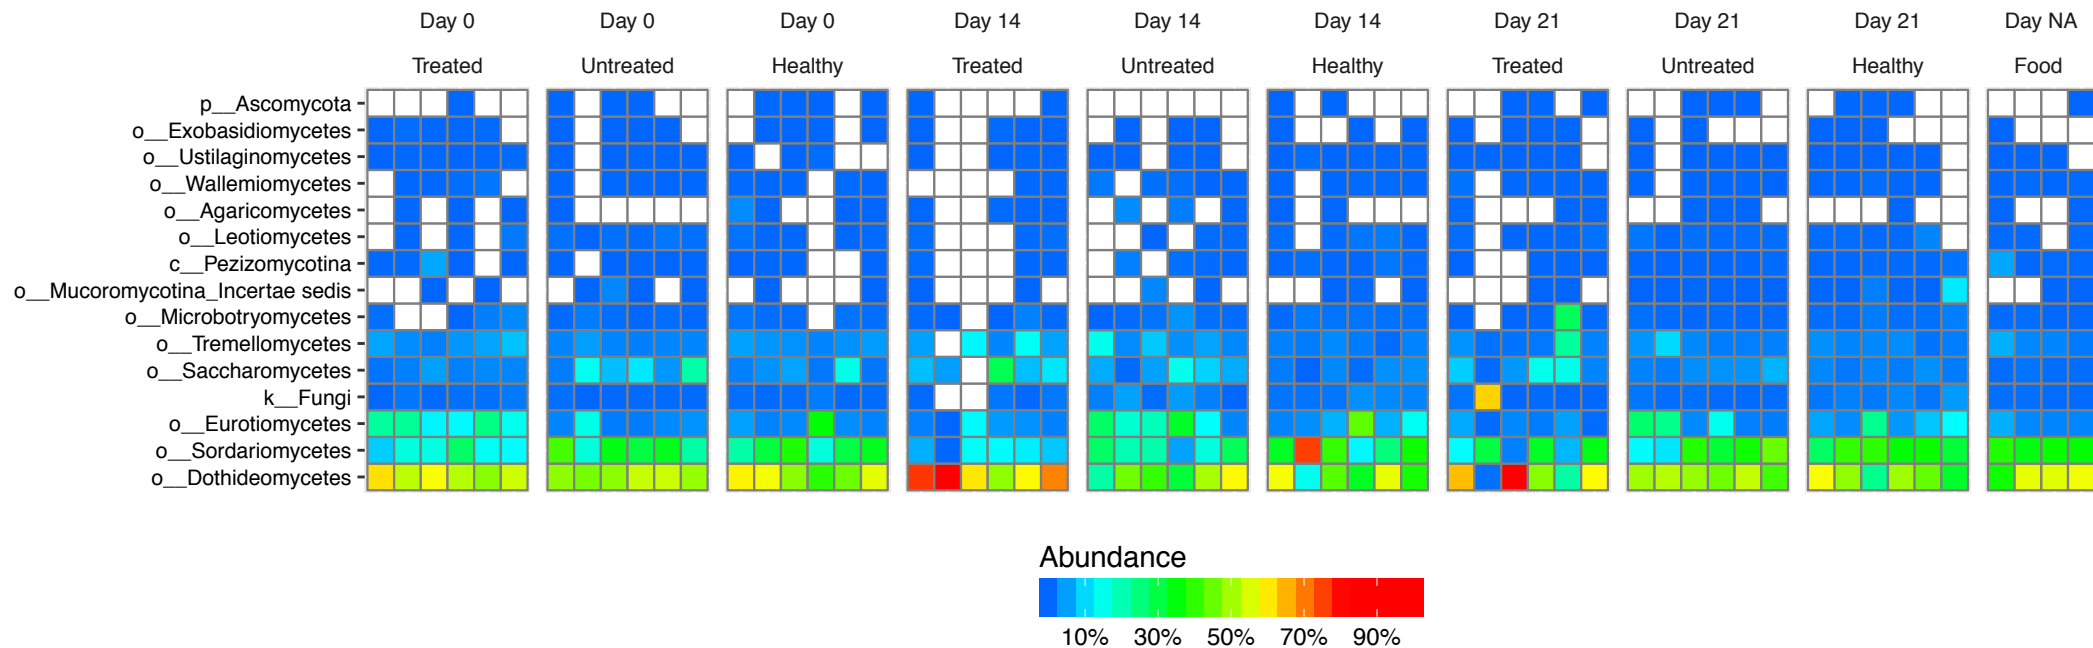**B**

## Fungal taxa in tissue; raw reads and blanks

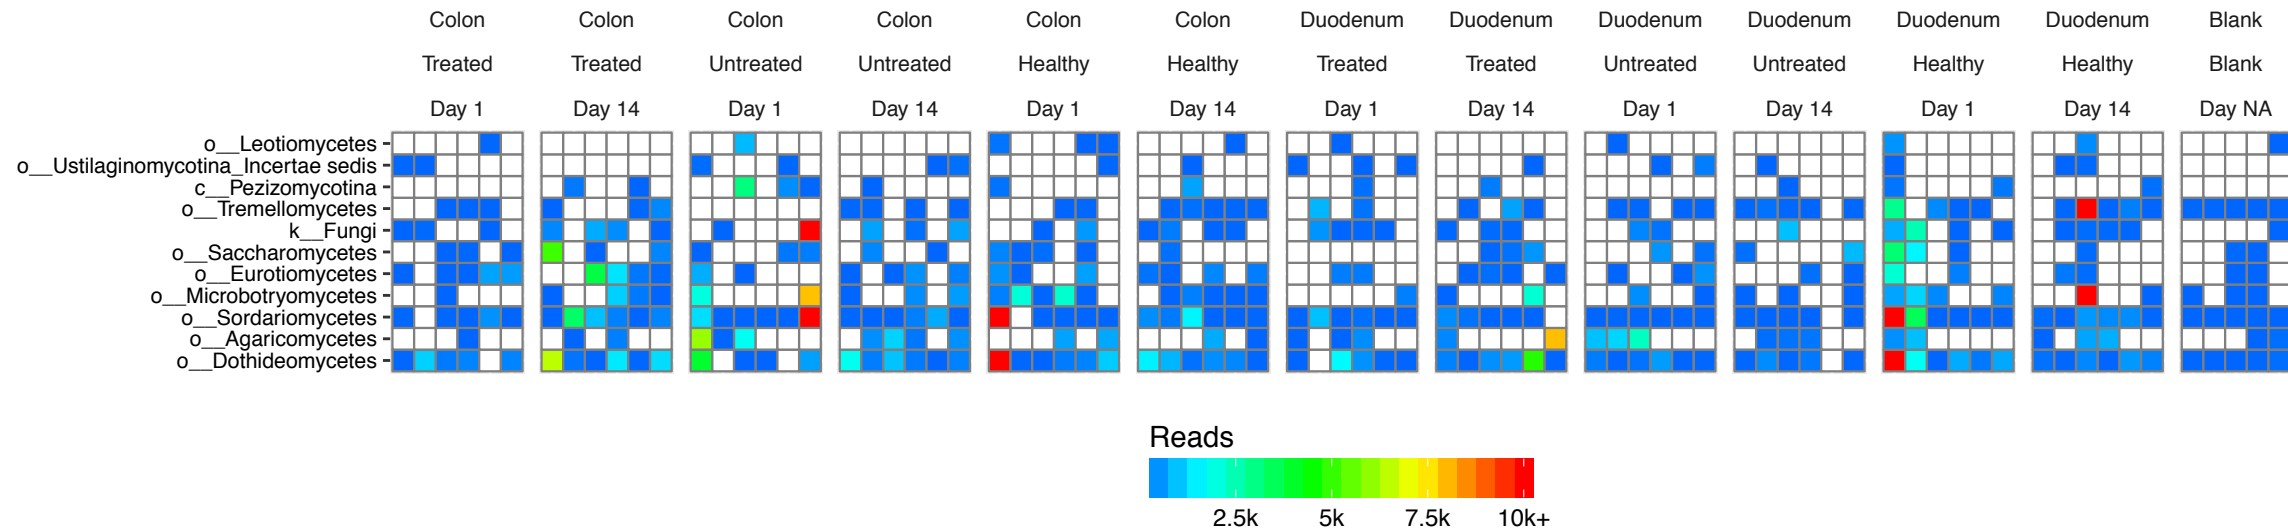

Supplement: ice_figS5.pdf [file ice_figS5.pdf]
