# Supplementary material for: Evaluation of a therapy for Idiopathic Chronic Enterocolitis in rhesus macaques (Macaca mulatta) and linked microbial community correlates
Source: PeerJ journal article supplement (doi:10.7717/peerj.4612), 2018-04-11

Age By Group

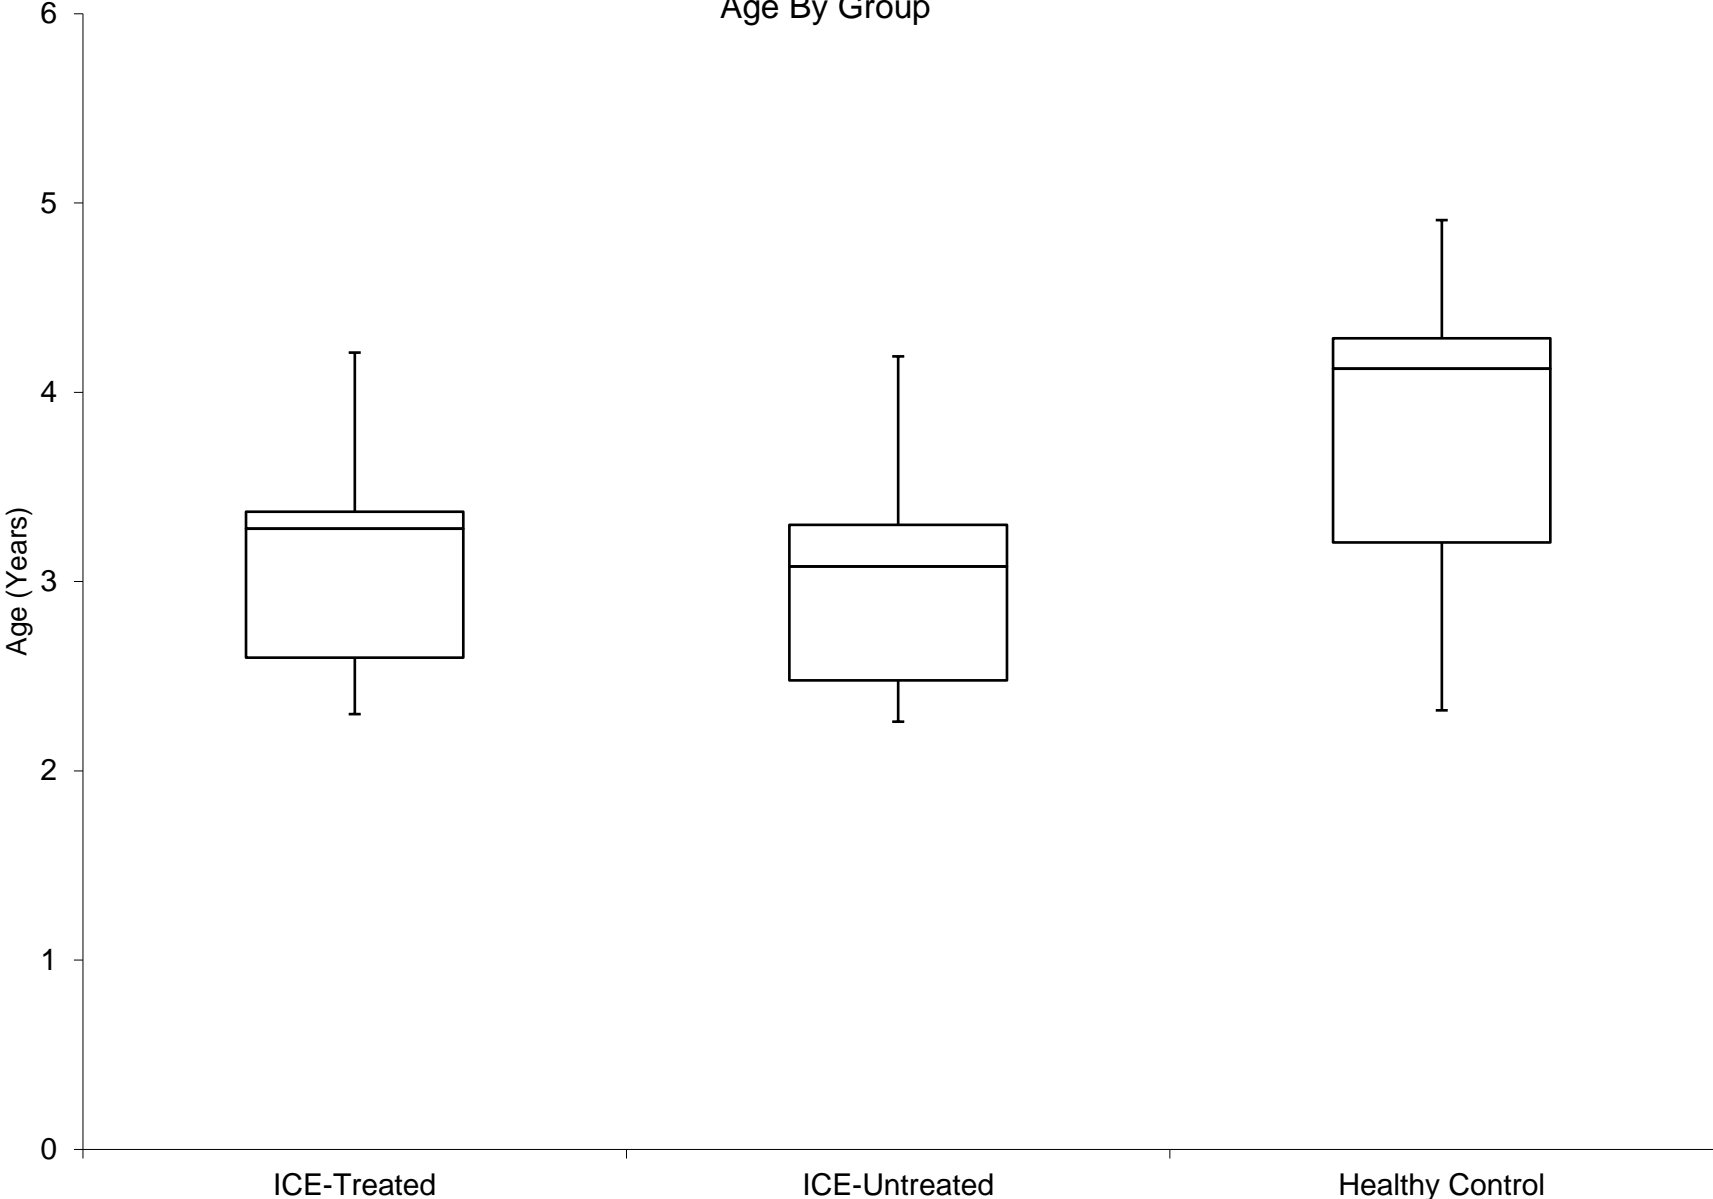

Supplement: ice_figS7.pdf [file ice_figS7.pdf]
