# Supplementary material for: Evaluation of a therapy for Idiopathic Chronic Enterocolitis in rhesus macaques (Macaca mulatta) and linked microbial community correlates
Source: PeerJ. 2018 Apr 11;6:e4612. doi: 10.7717/peerj.4612 (PMC5899420; doi:10.7717/peerj.4612)
Supplement: Supplemental Information 1 — Subjects were observed daily for presence and character of stool. N, Normal stool; S, Soft stool; L, Liquid stool. [file peerj-06-4612-s012.xlsx]

## Sheet: Group 1
Observation Day	Animal 1	Animal 2	Animal 3	Animal 4	Animal 5	Animal 6
Day 1	L	S
Day 2	L	S
Day 3	L	S
Day 4	L	L
Day 5	L	N
Day 6	L	N
Day 7	L	S
Day 8	L	N
Day 9	L	S
Day 10	N	S
Day 11	S	S
Day 12	L	S
Day 13	L	S
Day 14	L	S
Day 15	L	S		S
Day 16	L	S		S
Day 17	N	S		S
Day 18	S	S		S
Day 19	L	L		S
Day 20	N	L		L
Day 21	N	L		L
Day 22	S	L		L
Day 23	L	N		L
Day 24	L	S		L
Day 25	L	S		N
Day 26	L	S		N
Day 27	N	S		S
Day 28	S	N		N
Day 29	N	L	L	S
Day 30	S	S	N	S
Day 31	S	N	L	N
Day 32	N	S	N	N
Day 33	N	L	N	L
Day 34	N	L	N	S
Day 35	S	N	N	N
Day 36	L	N	N	N
Day 37	L	L	N	N		L
Day 38	L	L	N	N		L
Day 39	S	L	N	N		L
Day 40	N	N	N	N		N
Day 41	N	N	N	N		N
Day 42	N	L	L	N		L
Day 43	S	L	N	N		L
Day 44	N	N	L	N		L
Day 45	L	L	L	N		L
Day 46	N	N	N	N		L
Day 47	N	L	N	N		N
Day 48	N	N	N	N		S
Day 49	L	N	N	N		S
Day 50	L	S	L	N		N
Day 51	N	L	L	N		S
Day 52	N	L	N	N		S
Day 53	N	S	L	N		N
Day 54	N	N	N	N		N
Day 55	N	N	N	N		N
Day 56	N	N	N	N		L
Day 57	N	L	N	N		L
Day 58	N	L	N	N		L
Day 59	L	L	N	N		S
Day 60	N	L	N	N		S
Day 61	N	L	N	N		N
Day 62	N	N	N	N		N
Day 63	N	N	N	N		S
Day 64	N	L	N	N		S
Day 65	L	N	N	N		L
Day 66	L	L	N	N		L
Day 67	N	L	N	N		L
Day 68	N	N	N	N		N
Day 69	N	N	N	N		N
Day 70	L	L	N	N		L
Day 71	S	L	N	N		S
Day 72	N	L	N	N	L	L
Day 73	N	L	L	L	L	L
Day 74	S	L	S	S	L	L
Day 75	N	L	N	N	L	N
Day 76	N	L	N	N	L	N
Day 77	N	L	N	N	L	N
Day 78	N	L	L	L	L	S
Day 79	N	L	L	L	L	L
Day 80	S	L	L	L	L	S
Day 81	S	L	L	L	L	S
Day 82	N	S	N	L	N	N
Day 83	N	N	N	N	N	N
Day 84	N	S	N	N	S	S
Day 85	L	L	N	N	L	L
Day 86	S	L	S	N	L	L
Day 87	N	L	N	N	L	S
Day 88	N	L	N	N	L	S
Day 89	N	L	L	N	L	N
Day 90	N	L	L	N	L	N
Day 91	L	L	L	N	L	N
Day 92	L	L	L	N	L	S
Day 93	L	L	N	L	L	S
Day 94	S	L	L	L	L	L
Day 95	L	L	L	L	L	S
Day 96	S	L	L	N	L	N
Day 97	S	L	L	N	L	N
Day 98	L	L	L	N	L	L
Day 99	L	L	L	L	L	L
Day 100	L	L	L	L	L	S
Day 101	L	L	L	L	N	S
Day 102	L	L	L	L	N	N
Day 103	S	L	L	N	L	N
Day 104	S	L	L	L	L	N
Day 105	S	L	L	N	N	N
Day 106	N	L	L	L	L	N
Day 107	S	L	L	L	L	S
Day 108	L	L	L	N	L	N
Day 109	N	L	L	L	L	N
Day 110	N	L	N	N	N	N
Day 111	N	L	S	N	N	N
Day 112	S	S	L	N	N	N
Day 113	N	L	L	L	L	N
Day 114	N	L	L	S	L	N
Day 115	S	L	L	S	N	S
Day 116	N	L	L	N	N	N
Day 117	N	L	N	L	N	N
Day 118	N	L	N	N	L	N
Day 119	N	N	N	N	N	N
Day 120	S	L	N	N	L	N
Day 121	S	S	N	L	N	L
Day 122	N	S	L	L	S	N
Day 123	N	S	L	L	N	N
Day 124	N	N	N	N	N	N
Day 125	N	S	S	N	L	N
Day 126	N	L	L	N	N	N
Day 127	S	N	L	N	N	N
Day 128	L	L	L	N	N	N
Day 129	N	L	L	N	L	N
Day 130	N	L	N	L	S	N
Day 131	N	N	N	L	L	N
Day 132	L	N	N	L	L	N
Day 133	L	N	N	L	N	N
Day 134	N	N	N	L	N	N
Day 135	N	N	N	N	N	S
Day 136	L	N	N	N	N	N
Day 137	N	N	N	L	N	N
Day 138	N	S	N	S	N	N
Day 139	S	S	N	S	N	N
Day 140	L	L	S	L	N	N
Day 141	L	N	N	L	S	N
Day 142	L	L	N	L	N	N
Day 143	N	L	N	N	N	N
Day 144	N	N	N	N	S	N
Day 145	N	L	N	N	S	N
Day 146	L	N	N	N	S	N
Day 147	L	S	N	N	N	N
Day 148	N	L	N	S	S	N
Day 149	N	S	L	N	L	N
Day 150	N	S	L	N	S	N
Day 151	L	S	N	S	S	S
Day 152	N	N	N	N	N	N
Day 153	N	N	N	N	N	N
Day 154	N	N	N	N	N	N
Day 155	N	L	N	N	N	N
Day 156	N	L	L	L	N	N
Day 157	L	L	S	N	N	N
Day 158	S	S	N	S	N	N
Day 159	N	S	N	N	N	N
Day 160	N	N	N	L	N	N
Day 161	N	N	N	L	N	N
Day 162	N	N	N	S	N	N
Day 163	N	S	N	N	N	N
Day 164	N	S	N	S	N	N
Day 165	N	L	N	L	N	N
Day 166	N	N	N	N	N	N
Day 167	N	S	N	N	N	N
Day 168	L	S	N	N	N	N
Day 169	N	N	L	N	N	N
Day 170	L	N	N	S	N	N
Day 171	L	S	N	L	N	N
Day 172	N	N	N	N	N	N
Day 173	L	N	N	N	N	N
Day 174	S	S	L	N	N	N
Day 175	L	N	N	N	N	N
Day 176	N	N	L	N	N	N
Day 177	S	S	L	N	S	N
Day 178	N	S	L	N	S	N
Day 179	L	N	N	S	N	N
Day 180	N	S	L	S	N	N
Day 181	N	S	L	N	N	N
Day 182	N	N	L	N	N	N
Day 183	N	N	L	N	N	N
Day 184	N	S	L	S	S	N
Day 185	N	S	L	S	N	S
Day 186	N	S	L	N	N	N
Day 187	N	N	L	N	N	N
Day 188	N	N	L	N	N	N
Day 189	N	N	L	N	N	N
Day 190	N	N	L	N	N	N
Day 191	N	N	L	N	N	N
Day 192	N	N	L	N	N	N
Day 193	N	N	L	N	N	N
Day 194	S	N	L	N	N	N
Day 195	N	N	L	N	N	N
Day 196	N	N	L	N	N	N
Day 197	N	N	N	N	N	N
Day 198	N	N	N	N	N	N
Day 199	N	N	L	N	S	N
Day 200	N	N	L	N	N	N
Day 201	N	N	L	N	N	N
Day 202	N	N	L	N	N	N
Day 203	N	N	L	N	N	N
Day 204	N	N	L	N	N	N
Day 205	N	N	L	N	N	N
Day 206	N	N	L	N	N	N
Day 207	N	N	L	N	N	N
Day 208	N	N	L	N	N	N
Day 209	N	N	L	N	N	N	Treatment Period
Day 210	N	N	L	N	N	N
Day 211	N	N	N	N	N	N
Day 212	L	N	N	N	S	N
Day 213	N	N	N	S	N	N
Day 214	S	S	N	N	N	N
Day 215	N	N	N	N	N	L
Day 216	N	S	N	N	N	N
Day 217	N	S	N	N	N	N
Day 218	N	N	N	N	S	S
Day 219	N	N	N	N	N	N
Day 220	N	N	N	N	N	N
Day 221	N	N	N	N	N	N
Day 222	N	N	N	N	N	N
Day 223	N	N	N	N	N	N
Day 224	N	N	N	N	N	N
Day 225	N	N	N	N	N	N
Day 226	N	N	N	N	N	N
Day 227	N	N	N	N	N	N
Day 228	N	N	N	N	N	N
Day 229	N	N	N	N	N	N
Day 230	N	N	N	N	N	N
Day 231	N	N	N	N	N	N
Day 232	N	N	N	S	N	N
Day 233	N	N	N	N	N	N
Day 234	N	N	N	N	N	N
Day 235	N	N	N	N	N	N
Day 236	N	N	N	N	N	N
Day 237	N	N	N	N	N	N
Day 238	N	N	N	N	N	N
Day 239	N	S	N	N	N	N
Day 240	N	N	N	N	N	N
Day 241	N	N	N	N	N	N
Day 242	N	N	N	N	N	N
Day 243	N	N	N	N	N	N
Day 244	N	N	N	N	N	N
Day 245	N	N	N	N	N	N
Day 246	N	N	N	N	N	N
Day 247	N	N	N	N	N	N
Day 248	N	N	N	N	N	N
Day 249	N	N	N	N	N	N
Day 250	N	N	N	N	N	N
Day 251	N	N	N	N	N	N
Day 252	N	N	N	N	N	N
Day 253	N	N	N	N	N	N
Day 254	N	N	N	N	N	N
Day 255	N	N	N	N	N	N
Day 256	N	N	N	N	N	N
Day 257	N	N	N	N	N	N
Day 258	N	N	N	N	N	N
Day 259	N	N	N	N	N	N
Day 260	N	N	N	N	N	N
Day 261	N	N	N	N	N	N
Day 262	N	N	N	N	N	N
Day 263	N	N	N	N	N	N
Day 264	N	N	N	N	N	N
Day 265	N	N	N	N	N	N
Day 266	N	N	N	N	N	N
Day 267	N	N	N	N	N	N
Day 268	N	N	N	N	N	N
Day 269	N	N	N	N	N	N
Day 270	N	N	N	N	N	N
Day 271	N	N	N	N	N	N
Day 272	N	N	N	N	N	N
Day 273	N	N	N	N	N	N
Day 274	N	N	N	N	N	N
Day 275	N	N	N	N	N	N
Day 276	N	N	N	N	N	N
Day 277	N	N	N	N	N	N
Day 278	N	N	N	N	N	N
Day 279	N	N	N	N	N	N
Day 280	N	N	N	N	N	N
Day 281	N	N	N	N	N	N
Day 282	N	N	N	N	N	N
Day 283	N	N	N	N	N	N
Day 284	N	N	N	N	N	N
Day 285	N	N	N	N	N	N
Day 286	N	N	N	N	N	N
Day 287	N	N	N	N	N	N
Day 288	N	N	N	N	N	N
Day 289	N	N	N	N	N	N
Day 290	N	N	N	N	N	N
Day 291	N	N	S	N	N	N
Day 292	N	N	S	N	N	N
Day 293	N	N	N	N	N	N
Day 294	N	N	N	N	N	N
Day 295	N	N	S	N	N	N
Day 296	N	N	N	N	N	N
Day 297	N	N	N	N	N	N
Day 298	N	N	N	N	N	N
Day 299	N	N	N	N	N	N
Day 300	N	N	N	N	N	N
Day 301	N	N	S	N	N	N
Day 302	N	S	S	N	N	N
Day 303	N	N	N	N	N	N
Day 304	N	N	N	N	N	N
Day 305	N	N	N	N	N	N
Day 306	N	N	N	N	N	N
Day 307	N	N	S	N	N	N
Day 308	N	N	N	N	N	N
Day 309	N	N	N	N	N	N
Day 310	N	N	N	N	N	N
Day 311	N	N	N	N	N	N
Day 312	N	N	N	N	N	N
Day 313	N	N	N	N	N	N
Day 314	N	N	N	N	N	N
Day 315	N	N	N	N	N	N
Day 316	N	N	N	N	N	N
Day 317	N	N	N	N	N	N
Day 318	N	N	N	N	N	N
Day 319	N	N	N	N	N	N
Day 320	N	N	N	N	N	N
Day 321	N	N	N	N	N	N
Day 322	N	N	N	N	N	N
Day 323	N	N	N	N	N	N
Day 324	N	N	N	N	N	N
Day 325	N	N	N	N	N	N
Day 326	N	N	N	N	N	N
Day 327	N	N	N	N	N	N
Day 328	N	N	N	N	N	N
Day 329	S	N	N	N	N	N
Day 330	N	N	N	N	N	N
Day 331	N	N	N	N	N	N
Day 332	N	N	N	N	N	N
Day 333	N	N	N	N	N	N
Day 334	N	N	N	N	N	N
Day 335	S	N	N	N	N	N
Day 336	N	N	N	N	N	N
Day 337	N	N	N	N	N	N
Day 338	N	N	N	N	N	N
Day 339	N	N	N	N	N	N
Day 340	N	N	N	N	N	N
Day 341	N	N	N	N	N	N
Day 342	N	N	N	N	N	N
Day 343	N	N	N	N	N	N
Day 344	N	N	S	N	N	N
Day 345	N	N	N	N	N	N
Day 346	N	N	N	N	N	N
Day 347	N	N	N	N	N	N
Day 348	N	N	N	N	N	N
Day 349	N	N	N	N	N	N
Day 350	N	N	N	N	N	N
Day 351	N	N	N	N	N	N
Day 352	N	N	N	S	N	N
Day 353	N	N	N	N	N	N
Day 354	N	N	S	N	N	N
Day 355	N	N	N	N	N	N
Day 356	N	N	N	N	N	N
Day 357	N	N	N	N	N	N
Day 358	N	N	N	N	N	N
Day 359	N	N	N	N	N	N
Day 360	N	N	N	N	N	N
Day 361	N	N	N	N	N	N
Day 362	N	N	N	N	N	N
Day 363	N	N	S	N	N	N
Day 364	N	N	N	N	N	N
Day 365	N	N	N	N	N	N
Day 366	N	N	N	N	N	N
Day 367	N	N	N	N	N	N
Day 368	N	N	N	N	N	N
Day 369	N	N	N	N	N	N
Day 370	N	N	N	N	N	N
Day 371	N	N	N	N	N	N
Day 372	N	S	N	N	N	N
Day 373	N	N	N	N	N	N
Day 374	N	N	N	N	N	N
Day 375	N	N	N	N	N	N
Day 376	N	N	N	N	N	N
Day 377	N	N	N	N	N	N
Day 378	N	N	N	N	N	N
Day 379	N	N	N	N	N	N
Day 380	N	N	N	N	N	N
Day 381	N	N	N	N	N	N
Day 382	N	N	N	N	N	N
Day 383	N	N	N	N	N	N
Day 384	N	N	N	N	N	N
Day 385	N	N	N	N	N	N
Day 386	N	N	N	N	N	N
Day 387	S	N	N	N	N	N
Day 388	N	N	N	N	N	N
Day 389	N	N	N	N	N	N
Day 390	N	N	N	N	N	N
Day 391	N	N	N	N	N	N
Day 392	N	N	N	N	N	N
Day 393	N	N	N	N	N	N
Day 394	N	N	N	N	N	N
Day 395	S	N	N	N	N	N
Day 396	N	N	N	N	N	N
Day 397	N	N	N	N	N	N
Day 398	N	N	N	N	N	N
Day 399	N	N	N	N	N	N
Day 400	N	N	N	N	N	N
Day 401	N	N	N	N	N	N
Day 402	N	N	N	N	N	N
Day 403	N	N	N	N	N	N
Day 404	N	N	N	N	N	N
Day 405	N	N	N	N	N	N
Day 406	N	N	N	N	N	N
Day 407	N	N	N	N	N	N
Day 408	N	N	N	N	N	N
Day 409	N	N	N	N	N	N
Day 410	N	N	N	N	N	N
Day 411	N	N	N	N	N	N
Day 412	N	N	N	N	N	N
Day 413	N	N	N	N	N	N
Day 414	N	N	N	N	N	N
Day 415	N	N	N	N	N	N
Day 416	N	N	N	N	N	N
Day 417	N	N	N	N	N	N
Day 418	N	N	N	N	N	N
Day 419	N	N	N	N	N	N
Day 420	N	N	N	N	S	N
Day 421	N	N	N	N	N	N
Day 422	N	N	N	N	N	N
Day 423	N	N	N	N	N	N
Day 424	N	N	N	N	N	N
Day 425	N	N	N	N	N	N
Day 426	N	N	N	N	N	N
Day 427	N	N	N	N	N	N
Day 428	N	N	N	N	N	N
Day 429	N	N	N	N	N	N
Day 430	N	N	N	N	N	N
Day 431	N	N	N	N	N	N
Day 432	N	N	N	N	N	N
Day 433	N	N	N	N	N	N
Day 434	N	N	N	N	N	N
Day 435	N	N	N	N	N	N
Day 436	N	N	N	N	N	N
Day 437	N	N	S	N	N	N
Day 438	S	N	N	N	N	N
Day 439	N	N	N	N	N	N
Day 440	N	N	N	N	N	N
Day 441	S	N	N	N	N	N
Day 442	S	N	N	N	N	N
Day 443	S	N	N	N	N	N
Day 444	N	N	N	N	N	N
Day 445	S	N	N	N	N	N
Day 446	S	N	N	N	N	N
Day 447	S	N	N	N	S	N
Day 448	S	N	N	N	N	N
Day 449	S	N	N	N	N	N
Day 450	N	N	N	N	N	N
Day 451	N	N	N	N	N	N
Day 452	N	N	N	N	S	N
Day 453	N	N	N	N	N	N
Day 454	N	N	N	N	N	N
Day 455	N	N	N	N	N	N
Day 456	S	N	N	N	N	N
Day 457	N	N	N	N	N	N
Day 458	N	N	N	N	N	N
Day 459	N	N	N	N	N	N
Day 460	N	N	N	N	N	N
Day 461	N	N	N	N	N	N
Day 462	N	N	N	N	N	N
Day 463	N	N	N	N	N	N
Day 464	N	N	N	N	N	N
Day 465	N	N	N	N	N	N
Day 466	N	N	N	N	N	N
Day 467	N	N	N	N	N	N
Day 468	N	N	N	N	N	N
Day 469	N	N	N	N	N	N
Day 470	N	N	N	N	N	N
Day 471	N	N	N	N	N	N
Day 472	N	N	N	N	N	N
Day 473	N	N	N	N	N	N
Day 474	N	N	N	N	N	N
Day 475	N	N	N	N	N	N
Day 476	N	N	N	N	N	N
Day 477	N	N	N	N	N	N
Day 478	S	N	N	N	N	N
Day 479	N	N	N	N	N	N
Day 480	N	N	N	N	N	N

## Sheet: Group 2
Observation Day	Animal 1	Animal 2	Animal 3	Animal 4	Animal 5	Animal 6
Day 1	L
Day 2	L
Day 3	L
Day 4	L
Day 5	N
Day 6	L
Day 7	L
Day 8	N
Day 9	L
Day 10	N
Day 11	N
Day 12	L
Day 13	L
Day 14	L
Day 15	N
Day 16	L
Day 17	L
Day 18	L
Day 19	L
Day 20	S
Day 21	L
Day 22	L
Day 23	L
Day 24	L
Day 25	L
Day 26	L
Day 27	L
Day 28	L
Day 29	N
Day 30	S
Day 31	N
Day 32	S
Day 33	S
Day 34	L
Day 35	L
Day 36	L
Day 37	L
Day 38	S
Day 39	S
Day 40	L
Day 41	L
Day 42	L
Day 43	L
Day 44	L
Day 45	N
Day 46	L
Day 47	L
Day 48	L
Day 49	L
Day 50	L
Day 51	L
Day 52	N
Day 53	N
Day 54	N
Day 55	N
Day 56	N
Day 57	N
Day 58	N
Day 59	N
Day 60	N
Day 61	N
Day 62	N
Day 63	S
Day 64	N
Day 65	L
Day 66	L
Day 67	L
Day 68	L
Day 69	L
Day 70	L
Day 71	N
Day 72	N
Day 73	N
Day 74	N
Day 75	N
Day 76	N
Day 77	N
Day 78	N
Day 79	N
Day 80	N
Day 81	N
Day 82	N
Day 83	N
Day 84	N
Day 85	N
Day 86	N
Day 87	N
Day 88	N
Day 89	N
Day 90	N
Day 91	N
Day 92	S
Day 93	S
Day 94	S
Day 95	S
Day 96	S
Day 97	S
Day 98	S
Day 99	S
Day 100	S				L	L
Day 101	S			S	N	L
Day 102	S			S	N	L
Day 103	S			S	L	L
Day 104	S			S	L	L
Day 105	S			S	L	L
Day 106	N			S	L	L
Day 107	N			N	L	S
Day 108	N			S	N	S
Day 109	S			S	N	L
Day 110	N			S	N	L
Day 111	N			N	S	L
Day 112	N			S	S	L
Day 113	N			N	S	L
Day 114	N			S	S	L
Day 115	N			L	L	L
Day 116	N			L	S	L
Day 117	N			S	N	L
Day 118	N			S	S	L
Day 119	N			S	S	S
Day 120	S			S	N	L
Day 121	N			N	N	S
Day 122	N		S	S	S	L
Day 123	N		N	L	N	N
Day 124	N		N	S	N	L
Day 125	N		N	N	N	S
Day 126	S		S	S	N	L
Day 127	N		N	S	N	N
Day 128	N		N	N	N	L
Day 129	N		N	N	N	S
Day 130	N		N	N	N	L
Day 131	N		N	N	N	L
Day 132	N		N	S	N	N
Day 133	N		N	S	N	L
Day 134	N		N	N	N	L
Day 135	N		N	S	N	S
Day 136	S		S	S	L	N
Day 137	N		N	S	S	L
Day 138	N		N	N	S	S
Day 139	N		N	N	S	S
Day 140	N		N	N	S	S
Day 141	N		N	N	N	S
Day 142	N		N	N	N	N
Day 143	N		N	N	N	N
Day 144	N		N	N	N	N
Day 145	N		N	N	N	N
Day 146	N	L	S	N	N	N
Day 147	N	L	N	N	N	N
Day 148	N	L	S	N	N	S
Day 149	N	L	N	N	N	N
Day 150	N	L	S	N	N	N
Day 151	N	N	S	L	N	N
Day 152	N	L	N	N	N	N
Day 153	N	L	S	S	S	N
Day 154	N	L	L	N	N	N
Day 155	N	L	L	N	N	N
Day 156	N	L	L	L	N	N
Day 157	N	S	L	L	L	N
Day 158	N	S	L	L	L	N
Day 159	N	S	L	L	L	N
Day 160	N	S	L	L	L	N
Day 161	N	N	L	L	L	L
Day 162	N	S	L	L	L	S
Day 163	N	S	L	L	L	S
Day 164	N	S	L	L	L	N
Day 165	N	S	L	L	L	N
Day 166	N	S	L	L	L	N
Day 167	N	S	L	L	S	N
Day 168	N	N	L	L	N	N
Day 169	N	S	L	L	S	N
Day 170	N	L	L	L	N	N
Day 171	N	L	L	L	S	N
Day 172	N	L	L	L	S	N
Day 173	N	L	L	L	N	N
Day 174	N	L	L	L	N	N
Day 175	N	L	L	L	N	N
Day 176	N	N	L	L	N	N
Day 177	N	L	L	L	N	N
Day 178	N	L	L	L	S	N
Day 179	N	S	L	S	L	N
Day 180	N	L	L	L	N	N
Day 181	N	L	N	S	S	N
Day 182	N	S	N	N	N	N
Day 183	N	L	L	S	N	N
Day 184	N	L	L	L	N	N
Day 185	N	L	N	L	N	N
Day 186	N	L	L	S	N	N
Day 187	N	L	L	L	N	N
Day 188	N	L	L	L	S	N
Day 189	N	N	L	S	N	N
Day 190	N	S	L	L	N	N
Day 191	N	S	N	L	N	N
Day 192	N	N	L	N	N	N
Day 193	N	N	S	S	N	N
Day 194	N	N	S	N	N	N
Day 195	N	N	L	L	L	N
Day 196	N	S	N	N	L	N
Day 197	N	N	S	L	L	N
Day 198	N	S	L	S	L	N
Day 199	N	N	N	S	N	N
Day 200	N	N	S	S	L	N
Day 201	N	S	S	L	L	N
Day 202	N	N	N	L	L	N
Day 203	N	N	S	L	L	N
Day 204	N	N	S	L	L	N
Day 205	N	N	N	L	L	N
Day 206	N	N	N	L	L	N
Day 207	N	N	S	L	L	N
Day 208	N	N	N	L	L	N
Day 209	N	N	S	L	L	S
Day 210	N	S	S	L	L	N
Day 211	N	S	S	L	L	S
Day 212	N	N	S	S	L	N
Day 213	N	N	N	L	N	N
Day 214	N	N	N	N	N	N
Day 215	N	N	N	L	N	N
Day 216	N	N	S	L	N	S
Day 217	N	N	S	L	L	S
Day 218	N	N	S	L	L	S
Day 219	N	N	L	N	L	N
Day 220	N	N	S	L	S	S
Day 221	N	N	S	L	S	S
Day 222	N	N	N	L	L	S
Day 223	N	N	N	L	S	S
Day 224	N	N	N	L	S	S
Day 225	N	N	N	L	N	S
Day 226	N	N	L	L	N	N
Day 227	N	N	S	L	L	N
Day 228	N	N	L	L	L	N
Day 229	N	N	L	L	L	S
Day 230	N	N	N	L	S	N
Day 231	N	N	N	L	L	N
Day 232	N	N	N	L	S	N
Day 233	N	S	N	L	N	N
Day 234	N	N	N	L	L	N
Day 235	N	S	N	L	L	N
Day 236	N	N	N	L	N	N
Day 237	N	N	N	N	L	N
Day 238	N	N	N	L	S	N
Day 239	N	N	N	L	S	N
Day 240	N	N	N	N	N	N
Day 241	N	N	N	N	N	N
Day 242	N	N	N	L	L	N
Day 243	N	N	N	L	L	N
Day 244	N	N	N	L	L	N
Day 245	N	N	N	L	L	N
Day 246	N	N	N	L	L	N
Day 247	N	N	N	L	L	N
Day 248	N	S	N	L	L	N
Day 249	N	N	N	L	L	N
Day 250	N	N	N	L	L	N
Day 251	N	N	N	L	L	S
Day 252	N	N	N	L	L	N
Day 253	N	N	N	L	L	S
Day 254	N	N	N	L	L	N
Day 255	N	N	N	N	N	N
Day 256	N	N	N	L	N	N
Day 257	N	N	N	L	S	N
Day 258	N	N	N	L	S	S
Day 259	N	N	N	L	N	N
Day 260	N	N	N	L	L	S
Day 261	N	N	N	L	S	S
Day 262	N	N	N	N	N	S
Day 263	N	N	N	N	L	S
Day 264	N	N	N	L	L	S
Day 265	N	N	N	L	S	N
Day 266	N	N	N	L	S	N
Day 267	N	N	N	L	L	N
Day 268	N	N	N	L	L	N
Day 269	N	N	N	L	L	N
Day 270	N	N	N	L	L	N
Day 271	N	N	N	L	L	N
Day 272	N	N	N	L	L	N
Day 273	N	N	N	L	L	N
Day 274	N	N	N	L	L	N
Day 275	N	N	N	L	L	N
Day 276	N	N	N	L	N	N
Day 277	N	N	N	L	S	N
Day 278	N	N	N	L	L	N
Day 279	N	N	N	L	L	N
Day 280	N	N	N	L	L	N
Day 281	N	N	N	L	L	N
Day 282	N	N	N	L	N	N
Day 283	N	N	N	L	N	N
Day 284	N	N	N	L	N	N
Day 285	N	N	N	L	S	N
Day 286	N	N	N	N	L	S
Day 287	N	N	N	L	S	N	Sham Treatment Period
Day 288	N	N	N	S	S	N
Day 289	N	N	N	S	L	N
Day 290	N	N	N	S	L	N
Day 291	N	N	N	S	L	N
Day 292	N	N	N	S	L	N
Day 293	N	N	N	S	S	S
Day 294	N	N	N	N	S	N
Day 295	N	N	N	N	L	N
Day 296	N	N	N	S	L	N
Day 297	N	N	N	S	L	N
Day 298	N	N	N	S	L	N
Day 299	N	N	N	S	L	N
Day 300	N	N	N	S	L	N
Day 301	N	N	N	S	L	N
Day 302	N	N	N	S	L	N
Day 303	N	N	N	S	L	N
Day 304	N	N	N	N	L	N
Day 305	N	N	N	N	N	N
Day 306	N	N	N	N	L	N
Day 307	N	N	N	N	L	N
Day 308	N	N	N	S	L	N
Day 309	N	N	N	S	L	N
Day 310	N	N	N	S	L	N
Day 311	N	N	N	N	L	N
Day 312	N	N	N	N	L	N
Day 313	N	N	N	N	L	N
Day 314	N	N	N	N	L	N
Day 315	N	N	N	S	L	N
Day 316	N	N	N	S	L	N
Day 317	N	N	N	S	L	N
Day 318	N	N	N	N	L	N
Day 319	N	N	N	N	L	N
Day 320	N	N	N	N	L	N
Day 321	N	N	N	S	L	N
Day 322	N	N	N	N	L	N
Day 323	N	N	N	N	L	N
Day 324	N	N	N	N	L	N
Day 325	N	N	N	N	L	N
Day 326	N	N	N	N	L	N
Day 327	N	N	N	N	L	N
Day 328	N	N	N	N	S	N
Day 329	N	N	N	S	S	N
Day 330	N	N	N	S	L	N
Day 331	N	N	N	N	L	S
Day 332	N	N	N	S	L	N
Day 333	N	N	N	S	L	N
Day 334	N	N	N	S	L	N
Day 335	N	N	N	S	L	N
Day 336	N	N	N	S	L	N
Day 337	N	N	N	S	L	N
Day 338	N	N	N	S	L	N
Day 339	N	N	N	S	L	N
Day 340	N	N	N	N	N	N
Day 341	N	N	N	S	L	N
Day 342	N	N	N	S	L	N
Day 343	N	N	N	S	L	N
Day 344	N	N	N	S	L	N
Day 345	N	N	N	S	L	N
Day 346	N	N	N	S	L	N
Day 347	N	N	N	S	L	N
Day 348	N	N	N	S	L	N
Day 349	N	N	N	S	L	N
Day 350	N	N	N	S	L	N
Day 351	N	N	N	N	L	N
Day 352	N	N	N	S	L	N
Day 353	N	N	N	S	L	N
Day 354	N	N	N	L	L	N
Day 355	N	N	N	N	L	N
Day 356	N	N	N	N	L	N
Day 357	N	N	N	S	L	N
Day 358	N	N	N	S	L	N
Day 359	N	N	N	S	L	N
Day 360	N	N	N	L	L	N
Day 361	N	N	N	S	L	N
Day 362	N	N	N	S	L	N
Day 363	N	N	N	L	L	N
Day 364	N	N	N	L	L	N
Day 365	N	N	N	S	L	N
Day 366	N	N	N	S	L	N
Day 367	N	N	N	N	L	N
Day 368	N	N	N	N	L	N
Day 369	N	N	N	S	L	N
Day 370	N	N	N	S	L	N
Day 371	N	N	N	S	L	N
Day 372	N	N	N	S	L	N
Day 373	N	N	N	N	S	N
Day 374	N	N	N	S	S	N
Day 375	N	N	N	S	S	N
Day 376	N	N	N	N	S	N
Day 377	N	N	N	S	L	N
Day 378	N	N	N	S	L	N
Day 379	N	N	N	S	L	N
Day 380	N	N	N	L	L	N
Day 381	N	N	N	S	L	N
Day 382	N	N	N	L	N	N
Day 383	N	N	N	N	N	N
Day 384	N	N	N	L	L	N
Day 385	N	N	N	S	L	N
Day 386	N	N	N	S	L	N
Day 387	N	N	N	S	L	N
Day 388	N	N	N	S	L	N
Day 389	N	N	N	L	L	N
Day 390	N	N	N	S	L	N
Day 391	N	N	N	S	L	N
Day 392	N	N	N	S	L	N
Day 393	N	N	N	S	N	N
Day 394	N	N	N	N	N	N
Day 395	N	N	N	S	L	N
Day 396	N	N	N	S	L	N
Day 397	N	N	N	S	L	N
Day 398	N	N	N	L	L	N
Day 399	N	N	N	L	L	N
Day 400	N	N	N	L	S	N
Day 401	N	N	N	L	L	N
Day 402	N	N	N	L	L	N
Day 403	N	N	N	L	L	N
Day 404	N	N	N	L	L	N
Day 405	N	N	N	L	L	N
Day 406	N	N	N	L	L	N
Day 407	N	N	N	L	L	N
Day 408	N	N	N	L	L	N

## Sheet: Group 3
Observation	Animal 1	Animal 2	Animal 3	Animal 4	Animal 5	Animal 6
Day 1	N	N	N	N	N	N
Day 2	N	N	N	N	N	N
Day 3	N	N	N	N	N	N
Day 4	N	N	N	N	N	N
Day 5	N	N	N	N	N	N
Day 6	N	N	N	N	N	N
Day 7	N	N	N	N	N	N
Day 8	N	N	N	N	N	N
Day 9	N	N	N	N	N	N
Day 10	N	N	N	N	N	N
Day 11	N	N	N	N	N	N
Day 12	N	N	N	N	N	N
Day 13	N	N	N	N	N	N
Day 14	N	N	N	N	N	N
Day 15	N	N	N	N	N	N
Day 16	N	N	N	N	N	N
Day 17	N	N	N	N	N	N
Day 18	N	N	N	N	N	N
Day 19	N	N	N	N	N	N
Day 20	N	N	N	N	N	N
Day 21	N	N	N	N	N	N
Day 22	N	N	N	N	N	N
Day 23	N	N	N	N	N	N
Day 24	N	N	N	N	N	N
Day 25	N	N	N	N	N	N
Day 26	N	N	N	N	N	N
Day 27	N	N	N	N	N	N
Day 28	N	N	N	N	N	N
Day 29	N	N	N	N	N	N
Day 30	N	N	N	N	N	N
Day 31	N	N	N	N	N	N
Day 32	N	N	N	N	N	N
Day 33	N	N	N	N	N	N
Day 34	N	N	N	N	N	N
Day 35	N	N	N	N	N	N
Day 36	N	N	N	N	N	N
Day 37	N	N	N	N	N	N
Day 38	N	N	N	N	N	N
Day 39	N	N	N	N	N	N
Day 40	N	N	N	N	N	N
Day 41	N	N	N	N	N	N
Day 42	N	N	N	N	N	N
Day 43	N	N	N	N	N	N
Day 44	N	N	N	N	N	N
Day 45	N	N	N	N	N	N
Day 46	N	N	N	N	N	N
Day 47	N	N	N	N	N	N
Day 48	N	N	N	N	N	N
Day 49	N	N	N	N	N	N
Day 50	N	N	N	N	N	N
Day 51	N	N	N	N	N	N
Day 52	N	N	N	N	N	N
Day 53	N	N	N	N	N	N
Day 54	N	N	N	N	N	N
Day 55	N	N	N	N	N	N
Day 56	N	N	N	N	N	N
Day 57	N	N	N	N	N	N
Day 58	N	N	N	N	N	N
Day 59	N	N	N	N	N	N
Day 60	N	N	N	N	N	N
Day 61	N	N	N	N	N	N
Day 62	N	N	N	N	N	N
Day 63	N	N	N	N	N	N
Day 64	N	N	N	N	N	N
Day 65	N	N	N	N	N	N
Day 66	N	N	N	N	N	N
Day 67	N	N	N	N	N	N
Day 68	N	N	N	N	N	N
Day 69	N	N	N	N	N	N
Day 70	N	N	N	N	N	N
Day 71	N	N	N	N	N	N
Day 72	N	N	N	N	N	N
Day 73	N	N	N	N	N	N
Day 74	N	N	N	N	N	N
Day 75	N	N	N	N	N	N
Day 76	N	N	N	N	N	N
Day 77	N	N	N	N	N	N
Day 78	N	N	N	N	N	N
Day 79	N	N	N	N	N	N
Day 80	N	N	N	N	N	N
Day 81	N	N	N	N	N	N
Day 82	N	N	N	N	N	N
Day 83	N	N	N	N	N	N
Day 84	N	N	N	N	N	N
Day 85	N	N	N	N	N	N
Day 86	N	N	N	N	N	N
Day 87	N	N	N	N	N	N
Day 88	N	N	N	N	N	N
Day 89	N	N	N	N	N	N
Day 90	N	N	N	N	N	N
Day 91	N	N	N	N	N	N
Day 92	N	N	N	N	N	N
Day 93	N	N	N	N	N	N
Day 94	N	N	N	N	N	N
Day 95	N	N	N	N	N	N
Day 96	N	N	N	N	N	N
Day 97	N	N	N	N	N	N
Day 98	N	N	N	N	N	N
Day 99	N	N	N	N	N	N
Day 100	N	N	N	N	N	N
Day 101	N	N	N	N	N	N
Day 102	N	N	N	N	N	N
Day 103	N	N	N	N	N	N
Day 104	N	N	N	N	N	N
Day 105	N	N	N	N	N	N
Day 106	N	N	N	N	N	N
Day 107	N	N	N	N	N	N
Day 108	N	N	N	N	N	N
Day 109	N	N	N	N	N	N
Day 110	N	N	N	N	N	N
Day 111	N	N	N	N	N	N	Orange Halves
Day 112	N	N	N	N	N	N
Day 113	N	N	N	N	N	N
Day 114	N	N	N	N	N	N
Day 115	N	N	N	N	N	N
Day 116	N	N	N	N	N	N
Day 117	N	N	N	N	N	N
Day 118	N	N	N	N	N	N
Day 119	N	N	N	N	N	N
Day 120	N	N	N	N	N	N
Day 121	N	N	N	N	N	N
Day 122	N	N	N	N	N	N
Day 123	N	N	N	N	N	N
Day 124	N	N	N	N	N	N
Day 125	N	N	N	N	N	N
Day 126	N	N	N	N	N	N
Day 127	N	N	N	N	N	N
Day 128	N	N	N	N	N	N
Day 129	N	N	N	N	N	N
Day 130	N	N	N	N	N	N
Day 131	N	N	N	N	N	N
Day 132	N	N	N	N	N	N
Day 133	N	N	N	N	N	N
Day 134	N	N	N	N	N	N
Day 135	N	N	N	N	N	N
Day 136	N	N	N	N	N	N
Day 137	N	N	N	N	N	N
Day 138	N	N	N	N	N	N
Day 139	N	N	N	N	N	N
Day 140	N	N	N	N	N	N
Day 141	N	N	N	N	N	N
Day 142	N	N	N	N	N	N
Day 143	N	N	N	N	N	N
Day 144	N	N	N	N	N	N
Day 145	N	N	N	N	N	N
Day 146	N	N	N	N	N	N
Day 147	N	N	N	N	N	N
Day 148	N	N	N	N	N	N
Day 149	N	N	N	N	N	N
Day 150	N	N	N	N	N	N
Day 151	N	N	N	N	N	N
Day 152	N	N	N	N	N	N
Day 153	N	N	N	N	N	N
Day 154	N	N	N	N	N	N
Day 155	N	N	N	N	N	N
Day 156	N	N	N	N	N	N
Day 157	N	N	N	N	N	N
Day 158	N	N	N	N	N	N
Day 159	N	N	N	N	N	N
Day 160	N	N	N	N	N	N
Day 161	N	N	N	N	N	N
Day 162	N	N	N	N	N	N
Day 163	N	N	N	N	N	N
Day 164	N	N	N	N	N	N
Day 165	N	N	N	N	N	N
Day 166	N	N	N	N	N	N
Day 167	N	N	N	N	N	N
Day 168	N	N	N	N	N	N
Day 169	N	N	N	N	N	N
Day 170	N	N	N	N	N	N
Day 171	N	N	N	N	N	N
Day 172	N	N	N	N	N	N
Day 173	N	N	N	N	N	N
Day 174	N	N	N	N	N	N
Day 175	N	N	N	N	N	N
Day 176	N	N	N	N	N	N
Day 177	N	N	N	N	N	N
Day 178	N	N	N	N	N	N
Day 179	N	N	N	N	N	N
Day 180	N	N	N	N	N	N
Day 181	N	N	N	N	N	N
Day 182	N	N	N	N	N	N
Day 183	N	N	N	N	N	N
Day 184	N	N	N	N	N	N
Day 185	N	N	N	S	N	N
Day 186	N	N	N	N	N	N
Day 187	N	N	N	N	N	N
Day 188	N	N	N	N	N	N
Day 189	N	N	N	N	N	N
